# Supplementary material for: Mechanisms of direct hydrogen peroxide synthesis on silicon and phosphorus dual-doped graphene: a DFT-D study
Source: Royal Society of Chemistry journal article supplement (doi:10.1039/c6cp08668c), 2017-01-01
Supplement: c6cp08668c1.pdf [file c6cp08668c1.pdf]

## Supporting Information

### The mechanisms of the direct synthesis of hydrogen peroxide on silicon and phosphorus dual doped graphene: A DFT-D study

Shuo Li <sup>a</sup>, Zhansheng Lu\* <sup>a,b</sup>, Yi Zhang <sup>a</sup>, Dongwei Ma <sup>d</sup>, Zongxian Yang <sup>a,c</sup>

<sup>a</sup> College of Physics and Materials Science, Henan Normal University, Xinxiang 453007, China

<sup>b</sup> State Key Laboratory of Surface Physics and Department of Physics, Fudan University, Shanghai 200433, P. R. China

<sup>c</sup> Collaborative Innovation Center of Nano Functional Materials and Applications, Kaifeng, China

<sup>d</sup> School of Physics, Anyang Normal University, Anyang 455000, China

We firstly considered that the Si and P replace two C atoms and all substrates (included type-I, type-II and type-III) are relaxed, as shown in Fig. S1. The most stable structures of type-I, type-II and type-III are in the leftmost column.

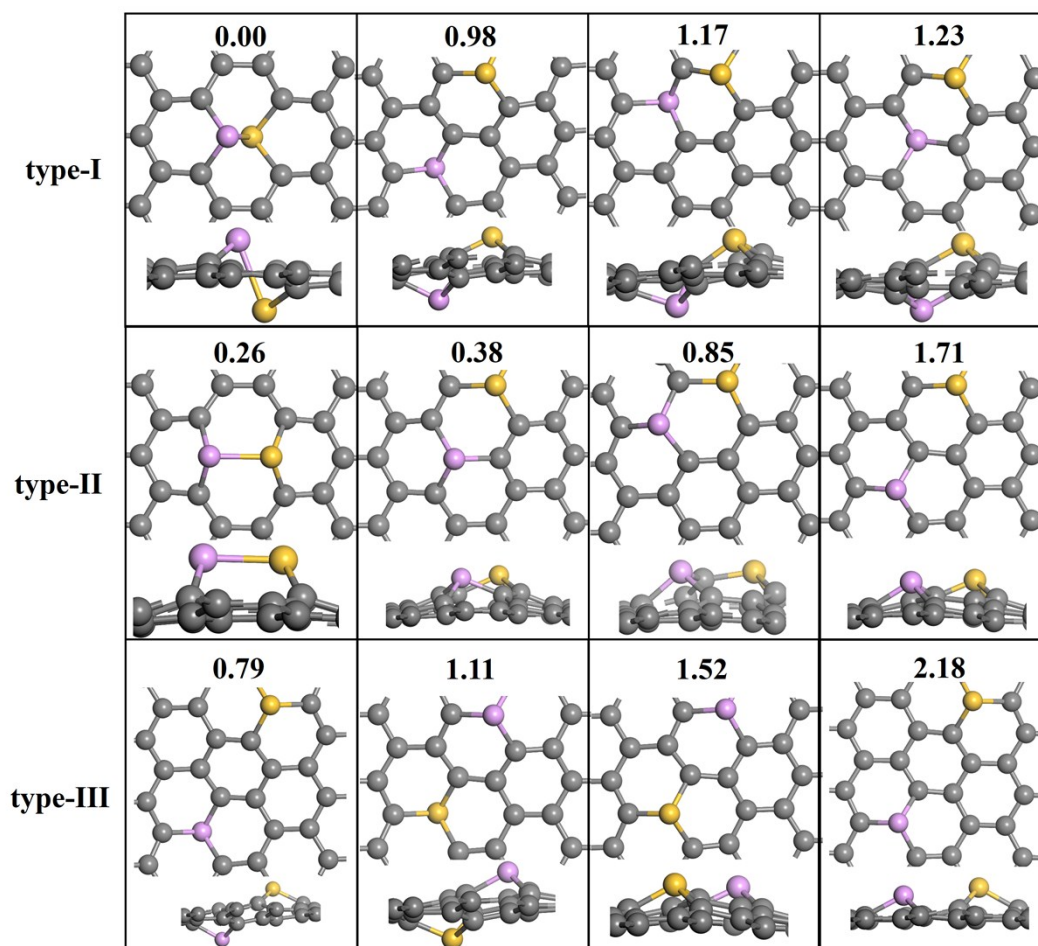

**Fig. S1** Atomic structures of relaxed structures for the various ORR chemical species adsorbed on Si-G-P. Gray, yellow and pink spheres represent C, Si and P atoms, respectively. The relative energy (eV) is marked in figures with the first substrate's energy for the zero potential energy.

The first substrate is selected for the adsorption of  $O_2$ , as shown in Fig. S2. We find that the formation  $PO_2$  species taken out the surface, indicating that Si is doped the defect graphene. A similar situation would still appear when the  $O_2$  is prepositioned on the Si atom. The  $O_2$  molecule would pull the Si atoms out of the surface.

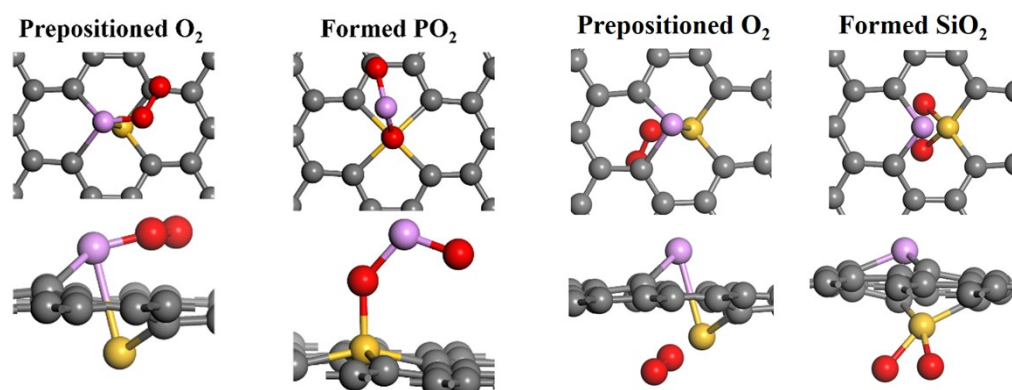

**Fig. S2** The  $O_2$  molecule adsorbed on the relaxed substrate. The prepositioned  $O_2$  is on left, while the relaxed configuration is on right. Gray, yellow, pink and red spheres represent C, Si, P and O atoms, respectively.

All designed possibilities are calculated for selecting the most stable selected substrates, as shown in Fig. S3. We find that the most stable substrate is formed the doped center of the Si dopant and the phosphorus dopant is neighbor with the atomic Si.

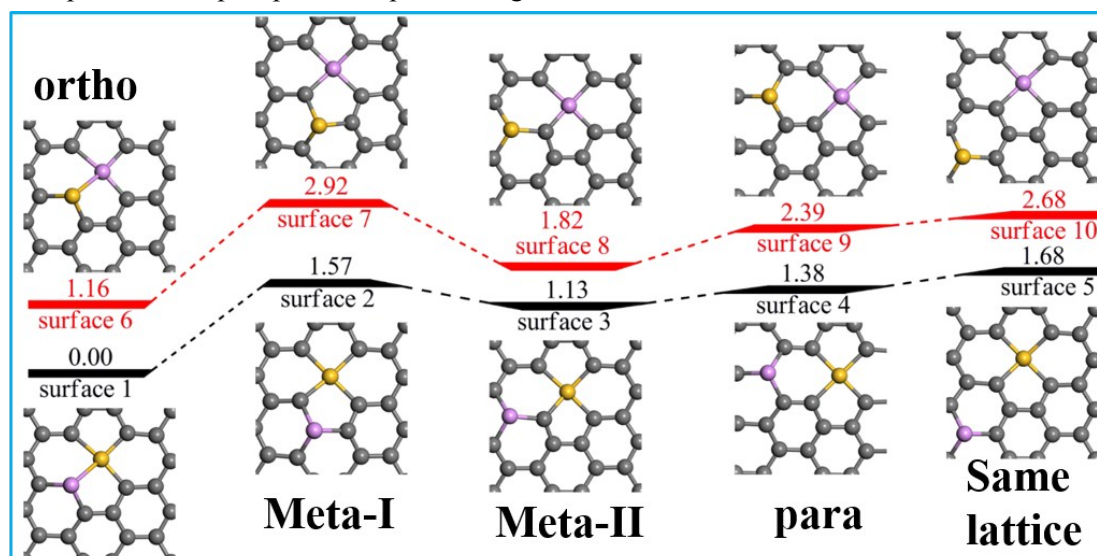

**Fig. S3** The dopant center of silicon and phosphorus is doped into graphene with the different substrate named ortho, meta-I, meta-II, para and same lattice (marked as "surface 1~10"). Gray, yellow and pink spheres represent C, Si and P atoms, respectively. The relative energy (eV) is marked in figures with the most stable substrate's energy for the zero potential energy.
